# Supplementary material
Source: PubMed Central journal article supplement (PMC3926889)
Supplement: cbt-14-922-s01.pdf [file cbt-14-922-s01.pdf]

## **Supplemental Material to:**

**Riccardo Di Fiore, Rosa Drago-Ferrante,  
Antonella D'Anneo, Giuseppa Augello, Daniela Carlisi,  
Anna De Blasio, Michela Giuliano, Giovanni Tesoriere,  
and Renza Vento**

**In human retinoblastoma Y79 cells okadaic acid-  
parthenolide co-treatment induces synergistic apoptotic  
effects, with PTEN as a key player**

**Cancer Biology & Therapy 2012; 14(10)**

**<http://dx.doi.org/10.4161/cbt.25944>**

**<http://www.landesbioscience.com/journals/cbt/article/25944/>**

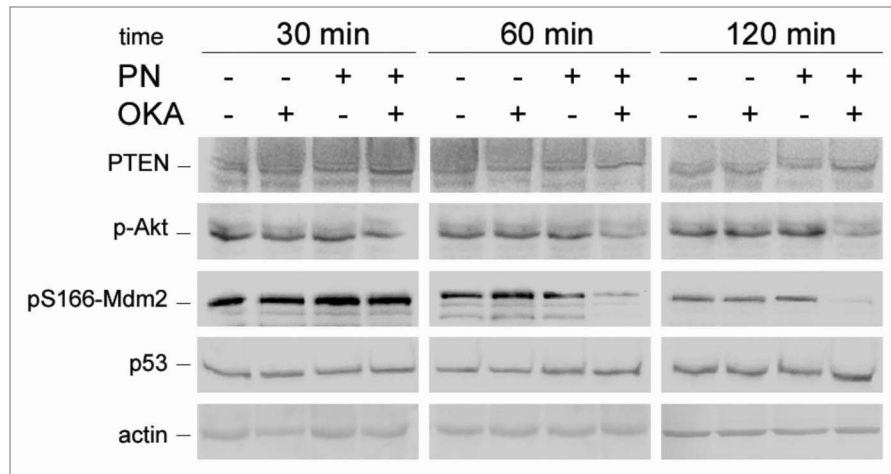

**Figure S1.** The figure reports western blotting analysis at 30-120 min after treatments. Actin was used as the loading control. Images are representative of at least four independent experiments. We analyzed the effects induced by OKA/PN at early times of treatment (30-120 min). Western blot analysis shows that PTEN level markedly increased at 30 min after OKA/PN treatment, thereafter (60 and 120 min) its level slight decreased. No effects were determined by single-drug treatment. PTEN induction by co-treatment was accompanied by potent lowering in p-Akt level at 30 min after treatment and progressively continued until 120 min when only a small level of p-Akt was observed. pS166-Mdm2 potently increased after 30 min, to lower after 60 min, becoming almost non-measurable after 120 min. These effects were accompanied by a strong increase in p53 level, observed at 60 min after treatment. Overall, the results suggest that PTEN could be the key player in the activation of the apoptotic pathway.
